# Supplementary material for: Improving estimation of a record breaking East Asian dust storm emission with lagged aerosol Ångström Exponent observations
Source: Copernicus journal article supplement (doi:10.5194/egusphere-2024-840), 2024-03-25
Supplement: Supplementary file [file egusphere-2024-840-AC2-supplement.pdf]

## Responses to the Community comment

We would like to thank to the reviewer for giving constructive criticisms, which are very helpful in improving the quality of the manuscript. We have made major revision based on the critical comments and suggestions of the referees. The referee's comments are reproduced (*black*) along with our replies (*blue*) and changes made to the text (*red*) in the revised manuscript. All the authors have read the revised manuscript and agreed with submission in its revised form.

### Anonymous Referee #2

**Comment NO.1:** *FR simulation has a large bias. It is known that the emission DA is sensitive to biases in the prior (e.g.: Tsikerdekis et al. 2022). I strongly recommend a calibration of the emission parameters prior to the assimilation experiments. Please give particular attention to the comments regarding the emission scheme in WRF by A. Ukhov (<https://doi.org/10.5194/egusphere-2024-840-CC1>)*

**Response:** Done. To reduce the underestimation of dust emission in AFWA scheme and start from a relatively unbiased simulation, the adjustable dust emission factor is calibrated and selected as 21 based on the AERONET-observed AOT and AE. This rescaling of emission can benefit the data assimilation since the Kalman filter assumes that the model is unbiased (Tsikerdekis et al., 2021).

Done. In order to investigate the influence of different dust emission schemes on the dust emission during 14-23 March 2021, another experiment named FR-dustopt1 (dust\_opt=1) has been conducted to compare with FR experiment (dust\_opt=3). The accumulated dust emissions in Gobi desert during 14-23 March 2021 are 36.99Tg and 43.00Tg for FR and FR-dustopt1 experiments. In general, the dust emission simulated by GOCART and AFWA dust emission schemes have no significant differences in Gobi desert. Therefore, we still use AFWA dust emission scheme in the revised manuscript.

References:

Tsikerdekis, A., Schutgens, N. A. J., and Hasekamp, O. P.: Assimilating aerosol optical properties related to size and absorption from POLDER/PARASOL with an ensemble data assimilation system, *Atmos. Chem. Phys.*, 21, 2637–2674, <https://doi.org/10.5194/acp-21-2637-2021>, 2021.

**Changes in Manuscript:** Please refer the description in the revised manuscript, from Page 5 Line 144 to Page 6 Line 146.

**Comment NO.2:** *The assimilated observations contain all aerosols, the simulated AOT and AE are calculated with all simulated aerosols, but only dust emissions are in the state vector. High AOD and low AE in Figure 5 indicate that the model is probably not simulating enough coarse particles (probably dust) over the sites. A simple calibration of the dust sources by a constant factor would be sufficient to improve the simulations in a similar way as the full data assimilation does here. This mismatch between the state variables and the observables is important, as it determines the ability of the data assimilation system to propagate the observational information into the model state, but it is only mentioned very superficially in the last line of the conclusions.*

**Response:** Done. To reduce the underestimation of dust emission in AFWA scheme and start from a relatively unbiased simulation, the adjustable dust emission factor is calibrated and selected as 21 based on the AERONET-observed AOT and AE. This rescaling of emission can benefit the data assimilation since the Kalman filter assumes that the model is unbiased (Tsikerdekis et al., 2021). Done. Since the East Asian dust storms are triggered by an exceptionally strong Mongolian cyclone and accompanied by strong northwesterly wind (Gui et al., 2021), human pollutants are difficult to accumulate in the downwind areas during this period. To minimize the influences of anthropogenic emissions, only the AERONET AOT and AE dominated by dust are assimilated to optimize the dust emissions, which are chosen with AE at 440-870 nm less than 0.4 (Huneeus et al., 2011). Therefore, the observables generally match the state variables.

References:

Gui, K., Yao, W., Che, H., An, L., Zheng, Y., Li, L., Zhao, H., Zhang, L., Zhong, J., Wang, Y., and Zhang, X.: Two mega sand and dust storm events over northern China in March 2021: transport processes, historical ranking and meteorological drivers, <https://doi.org/10.5194/acp-2021-933>, 1 December 2021.

Huneeus, N., Schulz, M., Balkanski, Y., Griesfeller, J., Prospero, J., Kinne, S., Bauer, S., Boucher, O., Chin, M., Dentener, F., Diehl, T., Easter, R., Fillmore, D., Ghan, S., Ginoux, P., Grini, A., Horowitz, L., Koch, D., Krol, M. C., Landing, W., Liu, X., Mahowald, N., Miller, R., Morcrette, J.-J., Myhre, G., Penner, J., Perlwitz, J., Stier, P., Takemura, T., and Zender, C. S.: Global dust model intercomparison in AeroCom phase I, *Atmospheric Chemistry and Physics*, 11, 7781–7816, <https://doi.org/10.5194/acp-11-7781-2011>, 2011.

Tsikerdekis, A., Schutgens, N. A. J., and Hasekamp, O. P.: Assimilating aerosol optical properties related to size and absorption from POLDER/PARASOL with an ensemble data assimilation system, *Atmos. Chem. Phys.*, 21, 2637–2674, <https://doi.org/10.5194/acp-21-2637-2021>, 2021.

**Changes in Manuscript:** Please refer the description in the revised manuscript, from Page 5 Line 144 to Page 6 Line 146 and Page 4 Line 101-102.

**Comment NO.3:** *The assimilated observations are from the Beijing area. This small spatial sample of assimilated observations, plus the way that the ensemble is constructed (by perturbing the emissions with a factor, one factor per ensemble), is likely to produce analyses emission corrections very homogeneous in the whole domain, meaning that the ratio between the analyses and first guess emissions is constant in the domain: increments of emissions in the western boundary (India and Pakistan) of Figures 1, 2 and 3 show this behaviour: the increments over Indian and Pakistan regions are similar to those of the Gobi desert, while the assimilated observations are located near Beijing. The temporal behaviour of the increments seems to show the same issue (Figure 4).*

**Response:** Dai et al. (2021) pointed that the independent emission perturbations over each model grid tend to underestimate the model spread due to the current limited ensemble members and the cancellation of neighbouring cells. Therefore, in the revised manuscript, the same random perturbation factors are used in the whole domain emission assimilation grids. The emission

correction is heterogeneous in the domain due to the perturbation of dust size distribution, the employment of horizontal localization, and the assimilation of observations from both dust source region and downwind area. As shown in Fig. 2, during 00:00-10:00 UTC 21 March 2021, the AOT DA-SZD experiment increases the dust emission in Gobi desert while it decreases the dust emission in Taklamakan desert, which indicated heterogeneous emission correction.

References:

Dai, T., Cheng, Y., Goto, D., Li, Y., Tang, X., Shi, G., and Nakajima, T.: Revealing the sulfur dioxide emission reductions in China by assimilating surface observations in WRF-Chem, *Atmos. Chem. Phys.*, 23, 2021.

**Comment NO.4:** *The assimilation and verification period is extremely short: 4 days with very few observations (see for example Figure 16). It may be difficult to draw conclusions from such a small observational sample. A longer study period would be highly beneficial, although it is not always possible to perform.*

**Response:** Done. Although it is not always possible to perform, the assimilation and verification period are extended from 14-17 March 2021 to 14-23 March 2021 to include both a strong dust storm and a weak dust storm.

**Changes in Manuscript:** Please refer the description in the revised manuscript, Page 7 Line 194-195.

**Comment NO.5:** *I haven't found strong evidence in the manuscript showing that the assimilation of AE improves the temporal and spatial variability of emissions or AOT. Also, it would be good to explain why AE assimilation increases AOD and consequently improves the skills. The scientific reason for this is not clear in this paper. It could be because it actually introduces important size information to the system, or just because it changes the balance between the observational and background terms in the cost function (adding more weight to the observations, for example), which in turn make the increments larger, which decreases the biases and improves the scores.*

**Response:** Done.

Our results demonstrate that the additional assimilation of AE observations with consideration of the dust emission size distribution uncertainty are helpful to the optimization of dust emission through better adjustment of dust size distribution. AOT assimilation can only optimize the dust emission flux depending on the covariance between time-lagged AOT observations and the simulated total dust emission, while the additional inclusion of AE assimilation can optimize the size distribution of dust emission and the associated total flux depending on the covariance between time-lagged AE observations and the simulated dust emission in each bin.

**Changes in Manuscript:** Please refer the detailed description in Sect. 4 in the revised manuscript.

**Comment NO.6:** *I would suggest that, in order to make the study more scientifically attractive and with more enriching conclusions, the experiments should start from a relatively unbiased FR. Also, as noted by some of the co-authors in a previous article (Dai et al. 2019, last paragraph of their conclusions), the design of ensemble (with no temporal and spatial variability) and the state vector*

*(only dust emissions) or other observation operator errors can negatively affect the results. Given the strong constrain on the time and location of the assimilated observations (and their spatio-temporal representativity) these issues are, in this case, utterly important.*

**Response:** Done. To reduce the underestimation of dust emission in AFWA scheme and start from a relatively unbiased simulation, the adjustable dust emission factor is calibrated and selected as 21 based on the AERONET-observed AOT and AE. This rescaling of emission can benefit the data assimilation since the Kalman filter assumes that the model is unbiased (Tsikerdekis et al., 2021).

Done. Compared with previous article, due to WRF-Chem model has uncertainty not only on dust emission but also on dust deposition (Huang et al., 2020) and dust optical properties (Di Biagio et al., 2019) in simulation, two assimilation experiments are conducted: one assimilation experiment named AOT+AE DA-SZD assimilates both AOT and AE observations with perturbation of dust size distribution, and the other experiment named AOT+AE DA assimilates both AOT and AE observations without perturbation of dust size distribution. The comparison between AOT+AE DA and AOT+AE DA-SZD experiments proves the need to considering uncertainty of dust size distribution in dust emission optimization.

References:

Di Biagio, C., Formenti, P., Balkanski, Y., Caponi, L., Cazaunau, M., Pangui, E., Journet, E., Nowak, S., Andreae, M. O., Kandler, K., Saeed, T., Piketh, S., Seibert, D., Williams, E., and Doussin, J.-F.: Complex refractive indices and single-scattering albedo of global dust aerosols in the shortwave spectrum and relationship to size and iron content, *Atmos. Chem. Phys.*, 19, 15503–15531, <https://doi.org/10.5194/acp-19-15503-2019>, 2019.

Huang, Y., Kok, J. F., Kandler, K., Lindqvist, H., Nousiainen, T., Sakai, T., Adebisi, A., and Jokinen, O.: Climate Models and Remote Sensing Retrievals Neglect Substantial Desert Dust Asphericity, *Geophysical Research Letters*, 47, e2019GL086592, <https://doi.org/10.1029/2019GL086592>, 2020.

Tsikerdekis, A., Schutgens, N. A. J., and Hasekamp, O. P.: Assimilating aerosol optical properties related to size and absorption from POLDER/PARASOL with an ensemble data assimilation system, *Atmos. Chem. Phys.*, 21, 2637–2674, <https://doi.org/10.5194/acp-21-2637-2021>, 2021.

**Changes in Manuscript:** Please refer the description in the revised manuscript, from Page 5 Line 144 to Page 6 Line 146 and from Page 7 Line 194 to Page 8 Line 210.

**Comment NO.7:** L15: *Please note that AE does not resolve particle size. It is sensitive to it, but not only.*

**Response:** Done. The sentence is modified as “Ångström Exponent (AE) which, measures the wavelength-dependence of aerosol optical thickness (AOT), is significantly sensitive to large aerosol such as dust.”

**Changes in Manuscript:** Please refer the modification in the revised manuscript, Page 1 Line 15-17.

**Comment NO.8:** L17: *I would suggest replacing the work "crucial" with "possible" or similar.*

**Response:** Done.

**Changes in Manuscript:** Please refer the modification in the revised manuscript, Page 1 Line 18.

**Comment NO.9:** L21: *The authors could replace the "official WRF-Chem" with the emission option they actually used.*

**Response:** The "official WRF-Chem" has been deleted.

**Comment NO.10:** L26: *Is it necessary to distinguish between Mongolia and China Gobi?*

**Response:** Agree. The Mongolia and China Gobi are merged.

**Changes in Manuscript:** Please refer to Fig. 2 in the revised manuscript.

**Comment NO.11:** L30: *Please revise the first sentence.*

**Response:** Agree. We have revised the first sentence as "Mineral dust is the most abundant atmospheric aerosol component in terms of aerosol dry mass in the atmosphere."

**Changes in Manuscript:** Please refer the modification in the revised manuscript, Page 2 Line 33.

**Comment NO.12:** L43-44: *It is very unlikely that we could fully understand the whole dust cycle by studying just one dust storm. Also, the logic of the argument and the connections between the sentences in these two lines are not clear.*

**Response:** Done. We have rephrased the sentence: Numerical model are important tools to study severe dust storm, and the dust emission is a significant quantity to characterize dust activity. However, due to insufficient knowledge of the actual dust mechanisms, more than ten fold diversity exists in simulated East Asian dust emissions among different models (Uno et al., 2006, Kok et al., 2021), indicating dust emission is a significantly uncertain process in dust simulation.

References:

Kok, J. F., Adebisi, A. A., Albani, S., Balkanski, Y., Checa-Garcia, R., Chin, M., et al. Contribution of the world's main dust source regions to the global cycle of desert dust (preprint). Atmospheric Chemistry and Physics. <https://doi.org/10.5194/acp-2021-4>, 2021.

Uno, I., Wang, Z., Chiba, M., Chun, Y. S., Gong, S. L., Hara, Y., & Jung, E. (n.d.). Dust model intercomparison (DMIP) study over Asia: Overview.

**Changes in Manuscript:** Please refer the description in the revised manuscript, Page 2 Line 44-47.

**Comment NO.13:** L45: *Please delete "simulation".*

**Response:** Done. We have deleted "simulation".

**Changes in Manuscript:** Please refer the modification in the revised manuscript, Page 2 Line 44.

**Comment NO.14:** L61: *Please add "domain" or similar: "... forecast in the global domain".*

**Response:** Accept. We add "domain".

**Changes in Manuscript:** Please refer the modification in the revised manuscript, Page 2 Line 62.

**Comment NO.15:** L64-65: *These lines are important for the manuscript, but not very precise. Please try to rewrite them.*

L66 : *Not so open. Please refer to the series of papers by Tsikerdekis et al. (ACP 2021, GMD 2022 and ACP 2023), where there is no explicit sensitivity of emissions to AE, but their usefulness can be*

*inferred.*

*L67-69: The authors just said that it was an open question, and they answer it here by saying that ground-based AE is critical for dust emissions. I think the authors are willing to say that ground-based AE is better than satellite-based AE, and can be more useful for optimizing dust emissions. Please note the accuracy of satellite retrieved AE depends on the instruments (not the same for MODIS than for multi-angle polarimeters), and on the retrievals algorithm.*

**Response:** Done. We have rewritten this paragraph: Except AOT, Ångström Exponent (AE) which measures the wavelength-dependence of AOT and is significantly sensitive to size of aerosol particle, may have a positive impact on data assimilation (Tsikerdekis et al., 2022, 2023). The estimated emission may be misrepresented by not including observations related to size (Tsikerdekis et al., 2021). However, most of the abovementioned studies have estimated new dust emissions based on the assimilation of AOT, while few studies have explored the potential benefits of aerosol size information like AE observations on improving the estimate of dust emission.

Therefore, how will the assimilation of the AE observations affects the optimization of the dust emission? It becomes an important scientific question. Due to the accuracy of satellite-retrieved AE depends on the instrument and retrieval algorithm, the ground-based AE is better than satellite-based AE and can be more useful for optimizing dust emissions.

References:

Tsikerdekis, A., Schutgens, N. A. J., and Hasekamp, O. P.: Assimilating aerosol optical properties related to size and absorption from POLDER/PARASOL with an ensemble data assimilation system, *Atmos. Chem. Phys.*, 21, 2637–2674, <https://doi.org/10.5194/acp-21-2637-2021>, 2021.

Tsikerdekis, A., Schutgens, N. A. J., Fu, G., and Hasekamp, O. P.: Estimating aerosol emission from SPEXone on the NASA PACE mission using an ensemble Kalman smoother: observing system simulation experiments (OSSEs), *Geosci. Model Dev.*, 15, 3253–3279, <https://doi.org/10.5194/gmd-15-3253-2022>, 2022.

Tsikerdekis, A., Hasekamp, O. P., Schutgens, N. A. J., and Zhong, Q.: Assimilation of POLDER observations to estimate aerosol emissions, *Atmos. Chem. Phys.*, 23, 9495–9524, <https://doi.org/10.5194/acp-23-9495-2023>, 2023.

**Changes in Manuscript:** Please refer the description in the revised manuscript, Page 3 Line 64-71.

**Comment NO.16:** *L70: The authors say here that they use the fixed-lag Kalman smoother (and later LETKF). Can it be provided a reference to the method that was actually used? Is it Dai et al. 2019?*

**Response:** The reference Dai et al. (2019) has been provided to the method.

**Changes in Manuscript:** Please refer the modification in the revised manuscript, Page 6 Line 163.

**Comment NO.17:** *L80: No need for "direct". Or it is referring to the "direct sun" product from AERONET?*

**Response:** Accept. The “direct” has been deleted.

**Changes in Manuscript:** Please refer the modification in the revised manuscript, Page 3 Line 84.

**Comment NO.18:** L84: *This is inaccurate. It should be clearer with the formula or point to a good reference.*

**Response:** Done. AE ( $\alpha$ ) at 440-870 nm is calculated with the AOT at 440 nm and 870 nm from the following equation:  $\alpha_{440-870} = -\ln(\tau_{870}/\tau_{440})/\ln(870/440)$ .

**Changes in Manuscript:** Please refer the modification in the revised manuscript, Page 3 Line 88-89.

**Comment NO.19:** L86: *This 0.05 seems a little arbitrary. Is there any reference for the accuracy of AERONET 440-870 AE?*

**Response:** Giles et al. (2019) pointed that the AE at 440–870 nm wavelength should not be used due to the inconsistency of the AOT spectral dependence at very low optical depth ( $< 0.05$ ).

Reference:

Giles, D. M., Sinyuk, A., Sorokin, M. G., Schafer, J. S., Smirnov, A., Slutsker, I., et al. Advancements in the Aerosol Robotic Network (AERONET) Version 3 database – automated near-real-time quality control algorithm with improved cloud screening for Sun photometer aerosol optical depth (AOD) measurements. *Atmospheric Measurement Techniques*, 12(1), 169–209. <https://doi.org/10.5194/amt-12-169-2019>, 2019.

**Changes in Manuscript:** Please refer the modification in the revised manuscript, Page 3 Line 90.

**Comment NO.20:** L90: *Why 0.025? how do was estimated this value?. So far the reader does not know the spatial resolution of the WRF grid.*

**Response:** Done. The representation error has been recalculated.

Due to the representation error is related to the WRF-Chem grid resolution, the representation error in AERONET AOT and AE is calculated depending on the AOT and AE temporal variability of AERONET and WRF-Chem with 45 km horizontal resolution (Schutgens et al., 2010). By averaging results at all AERONET sites in March 2021, the relative AOT temporal variations of AERONET and WRF-Chem in 1 h interval are  $0.11\tau$  and  $0.1\tau$ , while the AE temporal variations of AERONET and WRF-Chem in 1 h interval are 0.05 and 0.02, respectively. Therefore, the representation errors in AERONET AOT ( $\tau$ ) and AE in the 1 h interval are  $\epsilon_r = 0.01\tau$  and  $\epsilon_r = 0.03$ , respectively. The instrument error in AOT is defined as 0.015 and the instrument error of AE is estimated by propagating the instrument error in AOT at 440 and 870 nm (Schutgens et al., 2010).

References:

Schutgens, N. A. J., Miyoshi, T., Takemura, T., & Nakajima, T. Applying an ensemble Kalman filter to the assimilation of AERONET observations in a global aerosol transport model. *Atmos. Chem. Phys.*, 16, 2010.

**Changes in Manuscript:** Please refer the description in the revised manuscript, from Page 3 Line 92 to Page 4 Line 100.

**Comment NO.21:** L108: *"... with 45 km ..."*

**Response:** Done. We have replaced “with the 45 km” with “with 45 km”.

**Changes in Manuscript:** Please refer the modification in the revised manuscript, Page 5 Line 137.

**Comment NO.22:** L115: *size bins in diameter or radius?*

**Response:** Size bins in diameter.

**Changes in Manuscript:** Please refer the description in the revised manuscript, Page 5 Line 144.

**Comment NO.23:** L117: *MOSAIC acronym, description and need for use it is not clear here. Isn't this all done with GOCART?*

**Response:** Done. We have defined the acronym MOSAIC. The aerosol module used in this study is GOCART and the chemical composition of dust is unchanged during Mie calculation.

**Changes in Manuscript:** Please refer the description in the revised manuscript, Page 6 Line 150.

**Comment NO.24:** L128 *So the ensemble only has variability in dust emissions? Does this mean that all AOD and AE departures (AERONET minus model), where all aerosols are included, are only attributed to increases in dust emissions?*

**Response:** To investigate the influences of AERONET AE assimilation on the dust emission inversion, three assimilation experiments are conducted from 12:00 UTC on 11 March 2021 to 00:00 UTC on 24 March 2021. The assimilation experiment named AOT+AE DA assimilates both AOT and AE observations. 20 ensemble members are generated by perturbing the total dust emission, and the perturbation factor has a mean of 1 and a spread of 0.6 followed the lognormal distribution. The ensemble prediction dynamically estimates the covariance between the total dust emission and the aerosol optical properties. Due to WRF-Chem model has uncertainty not only on dust emission but also on dust deposition (Huang et al., 2020) and dust optical properties (Di Biagio et al., 2019) in simulation, two more assimilation experiments with perturbation of dust size distribution are conducted: one assimilation experiment named AOT DA-SZD only assimilates AERONET AOT observations and the other assimilation experiment named AOT+AE DA-SZD assimilates both AOT and AE observations. The ensemble prediction dynamically estimates the covariance between the dust emission in 5 dust size bins and the aerosol optical properties. 20 ensemble members are generated by perturbing the dust emission in each bin, and the perturbation factor of each bin has a mean of 1 and a spread of 0.6 followed the lognormal distribution. Correlated noise is used across the dust size bins in the perturbation for AOT DA-SZD and AOT+AE DA-SZD experiments so that noise correlation decreases with increased difference of the diameter among the bins (Di Tomaso et al., 2017). The comparison between AOT+AE DA and AOT+AE DA-SZD experiments proves the need to considering uncertainty of dust size distribution in dust emission inversion. The comparison between AOT DA-SZD and AOT+AE DA-SZD experiments proves the need of additional AE information in dust emission inversion.

Since the East Asian dust storms are triggered by an exceptionally strong Mongolian cyclone and accompanied by strong northwesterly wind (Gui et al., 2021), human pollutants are difficult to accumulate in the downwind areas during this period. To minimize the influences of anthropogenic emissions, only the AERONET AOT and AE dominated by dust are assimilated to optimize the dust emissions, which are chosen with AE at 440-870 nm less than 0.4 (Huneeus et al., 2011).



References:

Di Biagio, C., Formenti, P., Balkanski, Y., Caponi, L., Cazaunau, M., Pangui, E., Journet, E., Nowak, S., Andreae, M. O., Kandler, K., Saeed, T., Piketh, S., Seibert, D., Williams, E., and Doussin, J.-F.: Complex refractive indices and single-scattering albedo of global dust aerosols in the shortwave spectrum and relationship to size and iron content, *Atmos. Chem. Phys.*, 19, 15503–15531, <https://doi.org/10.5194/acp-19-15503-2019>, 2019.

Di Tomaso, E., Schutgens, N. A. J., Jorba, O., & Pérez García-Pando, C. Assimilation of MODIS Dark Target and Deep Blue observations in the dust aerosol component of NMMB-MONARCH version 1.0. *Geoscientific Model Development*, 10(3), 1107–1129. <https://doi.org/10.5194/gmd-10-1107-2017>, 2017.

Gui, K., Yao, W., Che, H., An, L., Zheng, Y., Li, L., Zhao, H., Zhang, L., Zhong, J., Wang, Y., and Zhang, X.: Two mega sand and dust storm events over northern China in March 2021: transport processes, historical ranking and meteorological drivers, <https://doi.org/10.5194/acp-2021-933>, 1 December 2021.

Huang, Y., Kok, J. F., Kandler, K., Lindqvist, H., Nousiainen, T., Sakai, T., Adebisi, A., and Jokinen, O.: Climate Models and Remote Sensing Retrievals Neglect Substantial Desert Dust Asphericity, *Geophysical Research Letters*, 47, e2019GL086592, <https://doi.org/10.1029/2019GL086592>, 2020.

Huneus, N., Schulz, M., Balkanski, Y., Griesfeller, J., Prospero, J., Kinne, S., Bauer, S., Boucher, O., Chin, M., Dentener, F., Diehl, T., Easter, R., Fillmore, D., Ghan, S., Ginoux, P., Grini, A., Horowitz, L., Koch, D., Krol, M. C., Landing, W., Liu, X., Mahowald, N., Miller, R., Morcrette, J.-J., Myhre, G., Penner, J., Perlwitz, J., Stier, P., Takemura, T., and Zender, C. S.: Global dust model intercomparison in AeroCom phase I, *Atmospheric Chemistry and Physics*, 11, 7781–7816, <https://doi.org/10.5194/acp-11-7781-2011>, 2011.

**Changes in Manuscript:** Please refer the description in the revised manuscript, from Page 7 Line 194 to Page 8 Line 210 and Page 4 Line 101-102.

**Comment NO.25:** L131-132: *This is not clear. Please clarify.*

**Response:** Done. As shown in Fig. S1, based on the EnKS, the dust emission of WRF-Chem ensemble is optimized every 12 h, which corresponding to the assimilation time window of 12 h. Each assimilation cycle advances a time step of 12 h, and the dust emissions for 6 time steps are optimized using the observations in the 6th time step. After each assimilation cycle, the dust emission for the first time step is the final optimized result, which has been optimized 6 times and will no longer be optimized in the next cycle. The finally optimized dust emissions therefore serve as the forced dust emissions for advancing the system one time step, and they provide the initial conditions for the next assimilation cycle.

**Changes in Manuscript:** Please refer the description in the revised manuscript, Page 6 Line 164-170.

**Comment NO.26:** L133: *Please clarify if the authors are using the lagged LETKF (e.g. Schutgens*

2012), the EnKS from Dai et al. 2019, or if it is the same method.

**Response:** Fixed-lag LETKF and Kalman smoother are the same method from Dai et al. (2019) and Schutgens et al. (2012).

References:

Dai, Cheng, Goto, Schutgens, Kikuchi, Yoshida, et al. Inverting the East Asian Dust Emission Fluxes Using the Ensemble Kalman Smoother and Himawari-8 AODs: A Case Study with WRF-Chem v3.5.1. *Atmosphere*, 10(9), 543. <https://doi.org/10.3390/atmos10090543>, 2019.

Schutgens, N., Nakata, M., & Nakajima, T. Estimating Aerosol Emissions by Assimilating Remote Sensing Observations into a Global Transport Model. *Remote Sensing*, 4(11), 3528–3543. <https://doi.org/10.3390/rs4113528>, 2012.

**Changes in Manuscript:** Please refer the description in the revised manuscript, Page 6 Line 163-164.

**Comment NO.27:** L137: Please revise if this is the Kalman gain. The Kalman gain in this context is clearly defined in Eq. 10 of Hunt et al. 2007, where it is the matrix in the left multiplication of the departures (in observational space), not the vector  $w$  (in ensemble space).

**Response:** Agree. The matrix  $\tilde{P}^a(Y^b)^T R^{-1}$  is called the “Kalman gain”.

**Changes in Manuscript:** Please refer the description in the revised manuscript, Page 6 Line 175.

**Comment NO.28:** L152: Again, 4D-LETKF or EnKS?

**Response:** Fixed-lag LETKF and Kalman smoother are the same method from Dai et al. (2019) and Schutgens et al. (2012).

References:

Dai, Cheng, Goto, Schutgens, Kikuchi, Yoshida, et al. Inverting the East Asian Dust Emission Fluxes Using the Ensemble Kalman Smoother and Himawari-8 AODs: A Case Study with WRF-Chem v3.5.1. *Atmosphere*, 10(9), 543. <https://doi.org/10.3390/atmos10090543>, 2019.

Schutgens, N., Nakata, M., & Nakajima, T. Estimating Aerosol Emissions by Assimilating Remote Sensing Observations into a Global Transport Model. *Remote Sensing*, 4(11), 3528–3543. <https://doi.org/10.3390/rs4113528>, 2012.

**Changes in Manuscript:** Please refer the description in the revised manuscript, Page 6 Line 163-164.

**Comment NO.29:** L165: Before showing the DA results, it would be useful to know exactly which and where observations were assimilated: for example, it would be sufficient to show their geographical location, time series and comparison with the FR performance in a qualitative sense. Also, if possible, the storm could be described in terms of AOD and AE from satellite observations, and if available, time-series of ground concentrations of TSP, PM20 or PM10 could be useful. The later can be also useful as complement to the lidar verification in the results section.

**Response:** Done.

As shown in Fig. 1(a), there are 5 AERONET sites with available observations from 14 March to 23 March 2021 for data assimilation, including 4 sites named as Beijing-CAMS (39.93°N,

116.32°E), Beijing (39.98°N, 116.38°E), Beijing\_PKU (39.99°N, 116.31°E), and Beijing\_RADI (40.00°N, 116.38°E) in the downwind area and a site near the dust source region named as Dalanzadgad (43.58°N, 104.42°E). The assimilated AOT and AE values at the AERONET sites are also given in Fig. 1(b,d). For Dalanzadgad site, the AOT values from 14 March to 17 March 2021 are significantly higher than those from 18 March to 23 March, while AE values show the opposite features.

Due to the Himawari-8 satellite observations are limited to be used during this period and the ground-based observations are difficult to be achieved, these evaluations will be shown in the future.

**Changes in Manuscript:** Please refer the description in the revised manuscript, Page 64 Line 105-111.

**Comment NO.30:** L182-183: *Interpretation of aerosol composition from a single value of AE does not seem a good practice.*

**Response:** Accept. We have deleted this sentence.

**Comment NO.31:** *Figures: If not already implemented, please try to follow the ACP recommendations on colour scales, font size, etc.*

**Response:** Done. We have tried to follow the ACP recommendations on colour scales, font size, etc.

**Comment NO.32:** L193: *It is not the best option to have different 3 figures for the 3 consecutive days.*

**Response:** Done.

**Changes in Manuscript:** Please refer the Fig. 3 and Fig. 5 in the revised manuscript.

**Comment NO.33:** L202-203 *Again, a simple plot of observations and model AOT and AE will be useful at this point (Fig 5 could also be referenced). It may just be a model bias (e.g. of other aerosols) that makes the difference.*

**Response:** Agree. Figs. 7-10 show the comparison of observed AOTs and AEs from AERONET and SONET versus the simulated ones.

To reduce the underestimation of dust emission in AFWA scheme and start from a relatively unbiased simulation, the adjustable dust emission factor is calibrated and selected as 21 based on the AERONET-observed AOT and AE. This rescaling of emission can benefit the data assimilation since the Kalman filter assumes that the model is unbiased (Tsikerdekis et al., 2021).

References:

Tsikerdekis, A., Schutgens, N. A. J., and Hasekamp, O. P.: Assimilating aerosol optical properties related to size and absorption from POLDER/PARASOL with an ensemble data assimilation system, *Atmos. Chem. Phys.*, 21, 2637–2674, <https://doi.org/10.5194/acp-21-2637-2021>, 2021.

**Changes in Manuscript:** Please refer the description in the revised manuscript, Page 5 Line 144-146.

**Comment NO.34:** L204-206: *So far there is no information in the manuscript to support such a statement. This could be partly solved by showing the assimilated locations and time series*

beforehand.

**Response:** Done.

**Changes in Manuscript:** The assimilated locations and time series are given in Fig. 1.

**Comment NO.35:** L213: *The usual terminology indicates that it is the model or the observation operator that is inverted, not the emissions. The word "inverted" could be replaced with "posterior".*

**Response:** The word "inverted" has been replaced with "posterior".

**Changes in Manuscript:** Please refer the modification in the revised manuscript, Page 13 Line 289.

**Comment NO.36:** L218-221: *First presentation of the assimilated observations. This information needs to be presented before the results section.*

**Response:** Done. As shown in Fig. 1(a), there are 5 AERONET sites with available observations from 14 March to 23 March 2021 for data assimilation, including 4 sites named as Beijing-CAMS (39.93°N, 116.32°E), Beijing (39.98°N, 116.38°E), Beijing\_PKU (39.99°N, 116.31°E), and Beijing\_RADI (40.00°N, 116.38°E) in the downwind area and a site near the dust source region named as Dalanzadgad (43.58°N, 104.42°E). The assimilated AOT and AE values at the AERONET sites are also given in Fig. 1(b,d). For Dalanzadgad site, the AOT values from 14 March to 17 March 2021 are significantly higher than those from 18 March to 23 March, while AE values show the opposite features.

**Changes in Manuscript:** Please refer the description in the revised manuscript, Page 64 Line 105-111.

**Comment NO.37:** L223: *Probably the word "obviously" is not really needed.*

**Response:** This sentence has been deleted.

**Comment NO.38:** L228-230: *Evaluation scores are computed by mixing assimilated and non-assimilated observations rather than separately, making the evaluations difficult to interpret.*

**Response:** Assimilated and non-assimilated observations have been separated.

**Changes in Manuscript:** Please refer to Fig. 7 and Fig. 8 in the revised manuscript.

**Comment NO.39:** L233-234: *The authors claim: "... and thus capture the aerosol spatiotemporal variation characteristics during dust transportation". True or not, this claim is not fully supported by the above results. Please revise this statement, as it is not obvious that the DA is doing more than just scaling the dust burden.*

**Response:** Done. This wrong statement has been deleted.

In this study, to reduce the underestimation of dust emission in AFWA scheme and start from a relatively unbiased simulation, the adjustable dust emission factor is calibrated and selected as 21 based on the AERONET-observed AOT and AE. This rescaling of emission can benefit the data assimilation since the Kalman filter assumes that the model is unbiased (Tsikerdekis et al., 2021). To investigate the influences of AERONET AE assimilation on the dust emission inversion, three assimilation experiments are conducted from 12:00 UTC on 11 March 2021 to 00:00 UTC on 24 March 2021. The assimilation experiment named AOT+AE DA assimilates both AOT and AE

observations. 20 ensemble members are generated by perturbing the total dust emission, and the perturbation factor has a mean of 1 and a spread of 0.6 followed the lognormal distribution. The ensemble prediction dynamically estimates the covariance between the total dust emission and the aerosol optical properties. Due to WRF-Chem model has uncertainty not only on dust emission but also on dust deposition (Huang et al., 2020) and dust optical properties (Di Biagio et al., 2019) in simulation, two more assimilation experiments with perturbation of dust size distribution are conducted: one assimilation experiment named AOT DA-SZD only assimilates AERONET AOT observations and the other assimilation experiment named AOT+AE DA-SZD assimilates both AOT and AE observations. The ensemble prediction dynamically estimates the covariance between the dust emission in 5 dust size bins and the aerosol optical properties. 20 ensemble members are generated by perturbing the dust emission in each bin, and the perturbation factor of each bin has a mean of 1 and a spread of 0.6 followed the lognormal distribution. Correlated noise is used across the dust size bins in the perturbation for AOT DA-SZD and AOT+AE DA-SZD experiments so that noise correlation decreases with increased difference of the diameter among the bins (Di Tomaso et al., 2017). The comparison between AOT+AE DA and AOT+AE DA-SZD experiments proves the need to considering uncertainty of dust size distribution in dust emission inversion. The comparison between AOT DA-SZD and AOT+AE DA-SZD experiments proves the need of additional AE information in dust emission inversion.

References:

Di Biagio, C., Formenti, P., Balkanski, Y., Caponi, L., Cazaunau, M., Pangui, E., Journet, E., Nowak, S., Andreae, M. O., Kandler, K., Saeed, T., Piketh, S., Seibert, D., Williams, E., and Doussin, J.-F.: Complex refractive indices and single-scattering albedo of global dust aerosols in the shortwave spectrum and relationship to size and iron content, *Atmos. Chem. Phys.*, 19, 15503–15531, <https://doi.org/10.5194/acp-19-15503-2019>, 2019.

Di Tomaso, E., Schutgens, N. A. J., Jorba, O., & Pérez García-Pando, C. Assimilation of MODIS Dark Target and Deep Blue observations in the dust aerosol component of NMMB-MONARCH version 1.0. *Geoscientific Model Development*, 10(3), 1107–1129. <https://doi.org/10.5194/gmd-10-1107-2017>, 2017.

Huang, Y., Kok, J. F., Kandler, K., Lindqvist, H., Nousiainen, T., Sakai, T., Adebisi, A., and Jokinen, O.: Climate Models and Remote Sensing Retrievals Neglect Substantial Desert Dust Asphericity, *Geophysical Research Letters*, 47, e2019GL086592, <https://doi.org/10.1029/2019GL086592>, 2020.

Tsikerdekis, A., Schutgens, N. A. J., and Hasekamp, O. P.: Assimilating aerosol optical properties related to size and absorption from POLDER/PARASOL with an ensemble data assimilation system, *Atmos. Chem. Phys.*, 21, 2637–2674, <https://doi.org/10.5194/acp-21-2637-2021>, 2021.

**Changes in Manuscript:** Please refer the description in the revised manuscript, Page 5 Line 144-146 and from Page 7 Line 194 to Page 8 Line 21.

**Comment NO.40:** *Figure 5: Please define this MFE. The standard definition is in the range [0,2].*

**Response:** Done. MFE has been defined and recalculated.

**Changes in Manuscript:** Please refer the description in the revised manuscript, Page 13 Line 291-294.

**Comment NO.41:** L248-258: *Differences between model experiments are clear, but it is extremely difficult to draw conclusions about model skill with such localised and small numbers of data points.*

**Response:** The assimilation and verification period are extended from 14-17 March 2021 to 14-23 March 2021 to include a strong dust storm and a weak dust storm, therefore, the data points are enough for drawing conclusions about model skill.

**Comment NO.42:** L258: *Again, AE could be useful to improve emissions, but it is not required.*

**Response:** Our results demonstrate that the additional assimilation of AE observations with consideration of the dust emission size distribution uncertainty are helpful to the optimization of dust emission through better adjustment of dust size distribution. AOT assimilation can only optimize the dust emission flux depending on the covariance between time-lagged AOT observations and the simulated total dust emission, while the additional inclusion of AE assimilation can optimize the size distribution of dust emission and the associated total flux depending on the covariance between time-lagged AE observations and the simulated dust emission in each bin.

**Changes in Manuscript:** Please refer the detailed description in Sect. 4 in the revised manuscript.

**Comment NO.43:** L280 and 282: *Please replace AOD+AR by AOD+AE. Please follow the ACP guidelines for figure composition.*

**Response:** Done. We have replaced “AOD+AR” with “AOD+AE”. We have followed the ACP guidelines for figure composition.

**Comment NO.44:** L319: *Please rewrite "in better consistent".*

**Response:** "in better consistent" has been deleted.

**Comment NO.45:** L324: *"Innovative superiority" may be an overstatement.*

**Response:** "Innovative superiority" has been deleted.
